# Supplementary material for: Patient Safety Events and Harms During Medical and Surgical Hospitalizations for Persons With Serious Mental Illness
Source: Atypon-hosted journal article supplement (doi:10.1176/appi.ps.201500415), 2016-05-16
Supplement: appi.ps.201500415.ds001.pdf [file appi.ps.201500415.ds001.pdf]

## Characteristics of hospitalizations within and not within 30 days of death

| Hospitalization Characteristics (n=790)       | Not within 30 days of death (n=488) | Within 30 days of death (n=302) | P-value |
|-----------------------------------------------|-------------------------------------|---------------------------------|---------|
| Patient Medical Comorbid Conditions           |                                     |                                 |         |
| Myocardial infarction/Coronary artery disease | 101 (21%)                           | 80 (26%)                        | 0.005   |
| Hypertension                                  | 218 (45%)                           | 135 (45%)                       | 0.74    |
| Peripheral vascular disease                   | 38 (8%)                             | 38 (13%)                        | 0.003   |
| Cerebrovascular disease                       | 60 (12%)                            | 46 (15%)                        | 0.04    |
| Chronic pulmonary disease                     | 125 (26%)                           | 95 (31%)                        | 0.06    |
| Mild liver disease                            | 54 (11%)                            | 30 (10%)                        | 0.18    |
| Moderate or severe liver disease              | 66 (14%)                            | 41 (14%)                        | 0.50    |
| Diabetes mellitus                             | 88 (18%)                            | 67 (22%)                        | 0.63    |
| Renal disease                                 | 72 (15%)                            | 62 (21%)                        | 0.003   |
| Malignancy                                    | 37 (8%)                             | 41 (14%)                        | 0.004   |
| Metastatic solid tumor                        | 15 (3%)                             | 41 (14%)                        | <0.001  |
| HIV                                           | 83 (17%)                            | 42 (14%)                        | 0.51    |
| Substance use disorder                        | 26 (9%)                             | 78 (16%)                        | 0.005   |
| Comorbidity Index (0-13)                      | 3.1 (3.0)                           | 4.3 (3.4)                       | <0.001  |
| Admitted through emergency department         | 379 (78%)                           | 246 (81%)                       | 0.05    |
| Admitting service                             |                                     |                                 |         |
| Medical                                       | 373 (76%)                           | 255 (84%)                       | <0.001  |
| Surgical                                      | 49 (10%)                            | 9 (3%)                          |         |
| Length of stay (days)                         | 13.1 (24.2)                         | 7.4 (7.2)                       | <0.001  |
| Teaching hospital                             | 309 (63%)                           | 185 (61%)                       | 0.32    |
| Hospital bed size                             |                                     |                                 |         |
| 0-250                                         | 135 (27%)                           | 88 (29%)                        | 0.25    |
| 251-400                                       | 197 (40%)                           | 105 (35%)                       |         |
| >400                                          | 152 (31%)                           | 95 (31%)                        |         |
